# Supplementary material
Source: MDPI journal article supplement (https://www.mdpi.com/2079-6412/10/4/417)
Supplement: s1 [file s1]

# Supplementary Material: Curves and Histograms

## Study of Particle Properties of Different Steels Sprayed by Arc Spray Process

Rodolpho F. Vaz <sup>1</sup>, Anderson G.M. Pukasiewicz <sup>2</sup>, Hipólito D.C. Fals<sup>2</sup>, Luciano A. Lourenço<sup>2</sup> and Ramon S.C. Paredes <sup>3</sup>

<sup>1</sup> Thermal Spray Center CPT. University of Barcelona. Carrer Martí i Franques 1. 08028. Barcelona, Spain. rvaz@cptub.eu

<sup>2</sup> Technological Federal University of Paraná. Av. Monteiro Lobato, km04. 84016-210. Ponta Grossa-PR, Brazil. anderson@utfpr.edu.br, hipolitofals@utfpr.edu.br, lalouren@utfpr.edu.br

<sup>3</sup> Federal University of Paraná. Av. Coronel Francisco H. Santos, 210. 81531-980. Curitiba-PR, Brazil. ramon@ufpr.br

\* Correspondence: rvaz@cptub.eu

Received: 12 March 2020; Accepted: 16 April 2020; Published: 23 April 2020

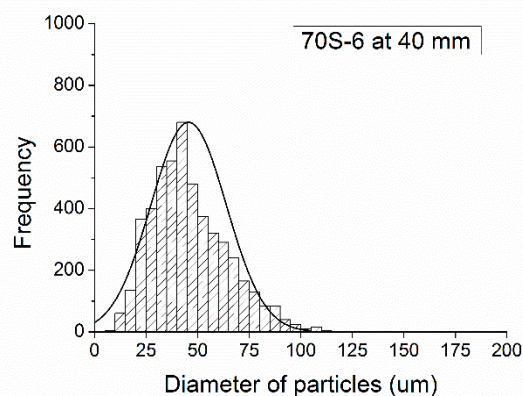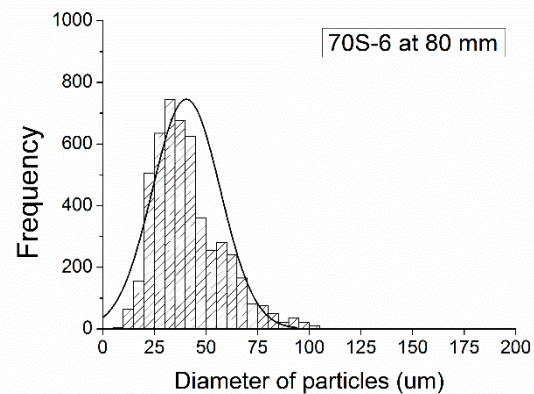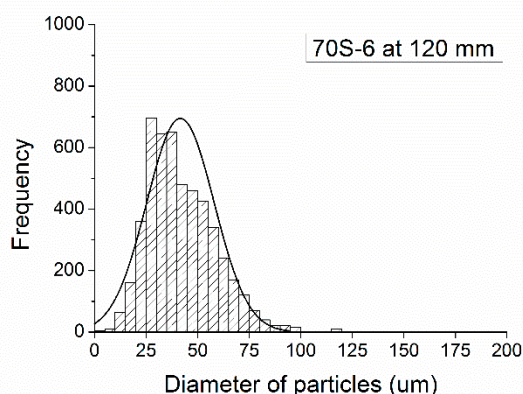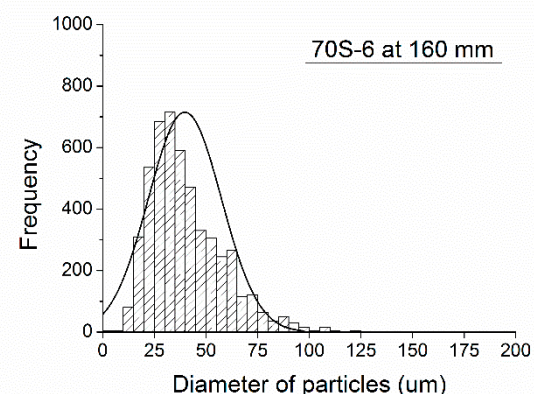

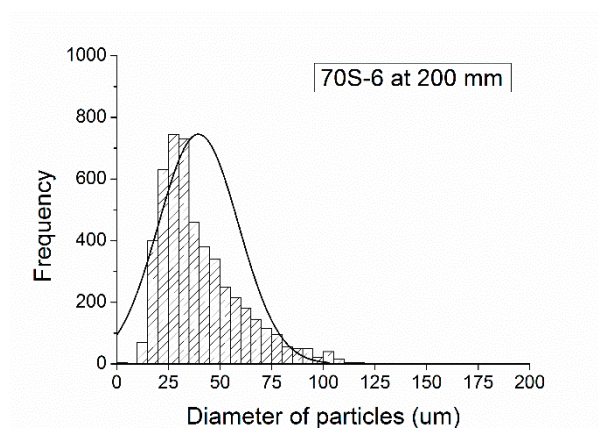

**Figure S1:** Histograms of diameter of 70S-6 particles observed in different distances from the gun.

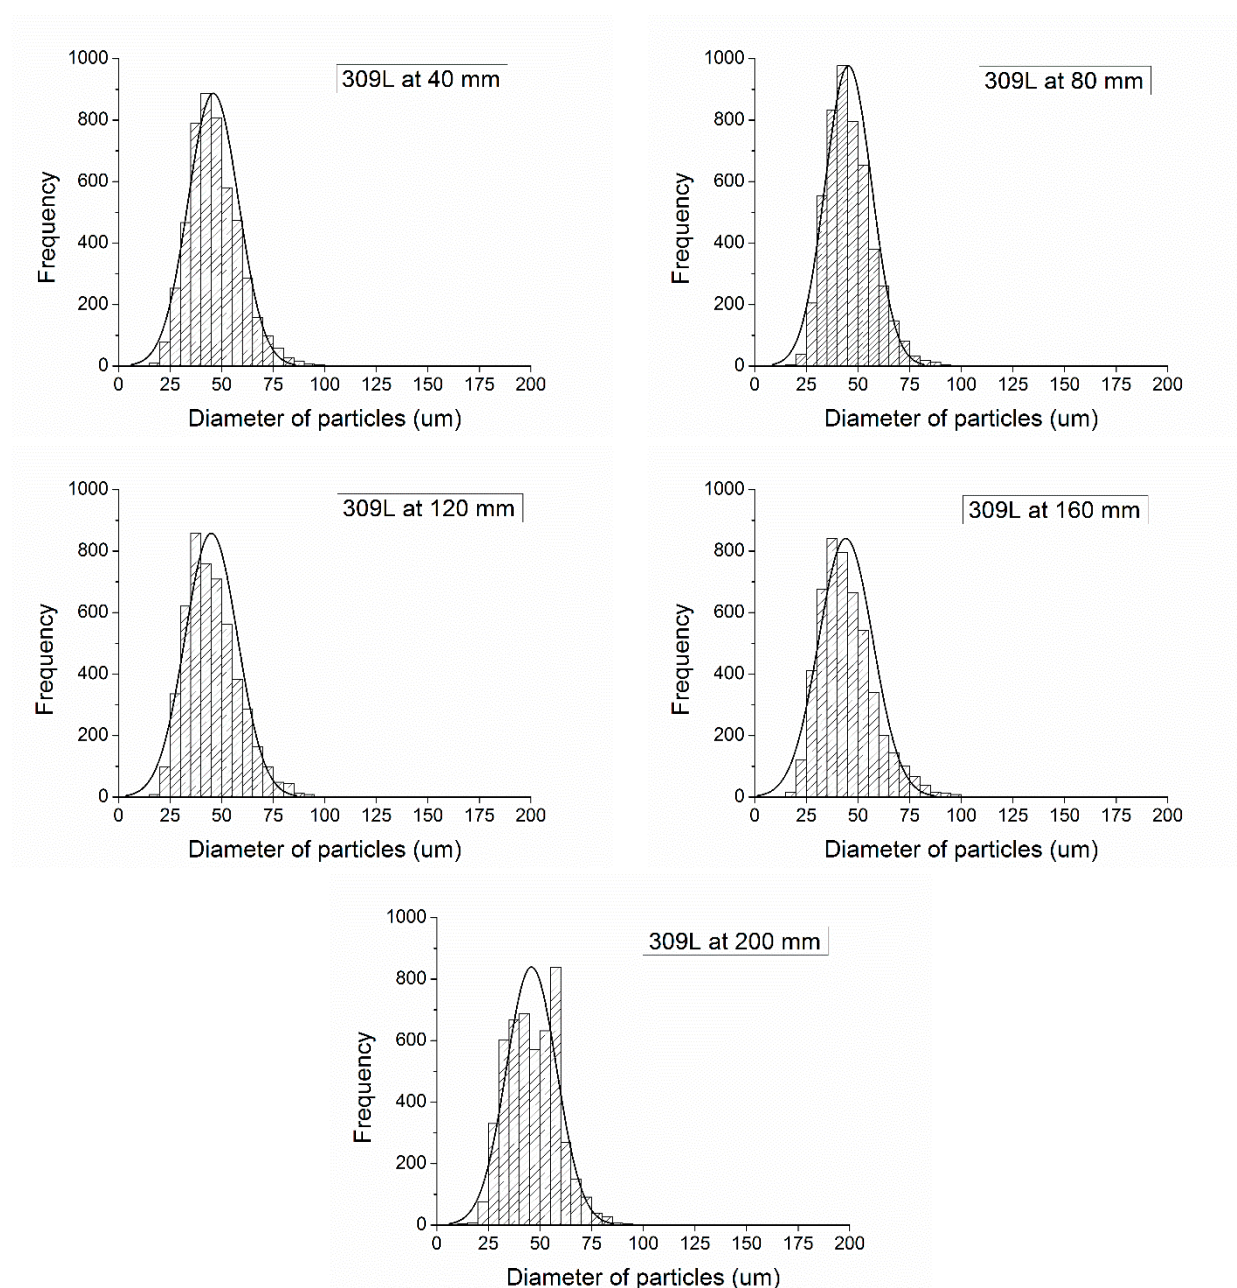

**Figure S2:** Histograms of diameter of 309L particles observed in different distances from the gun.



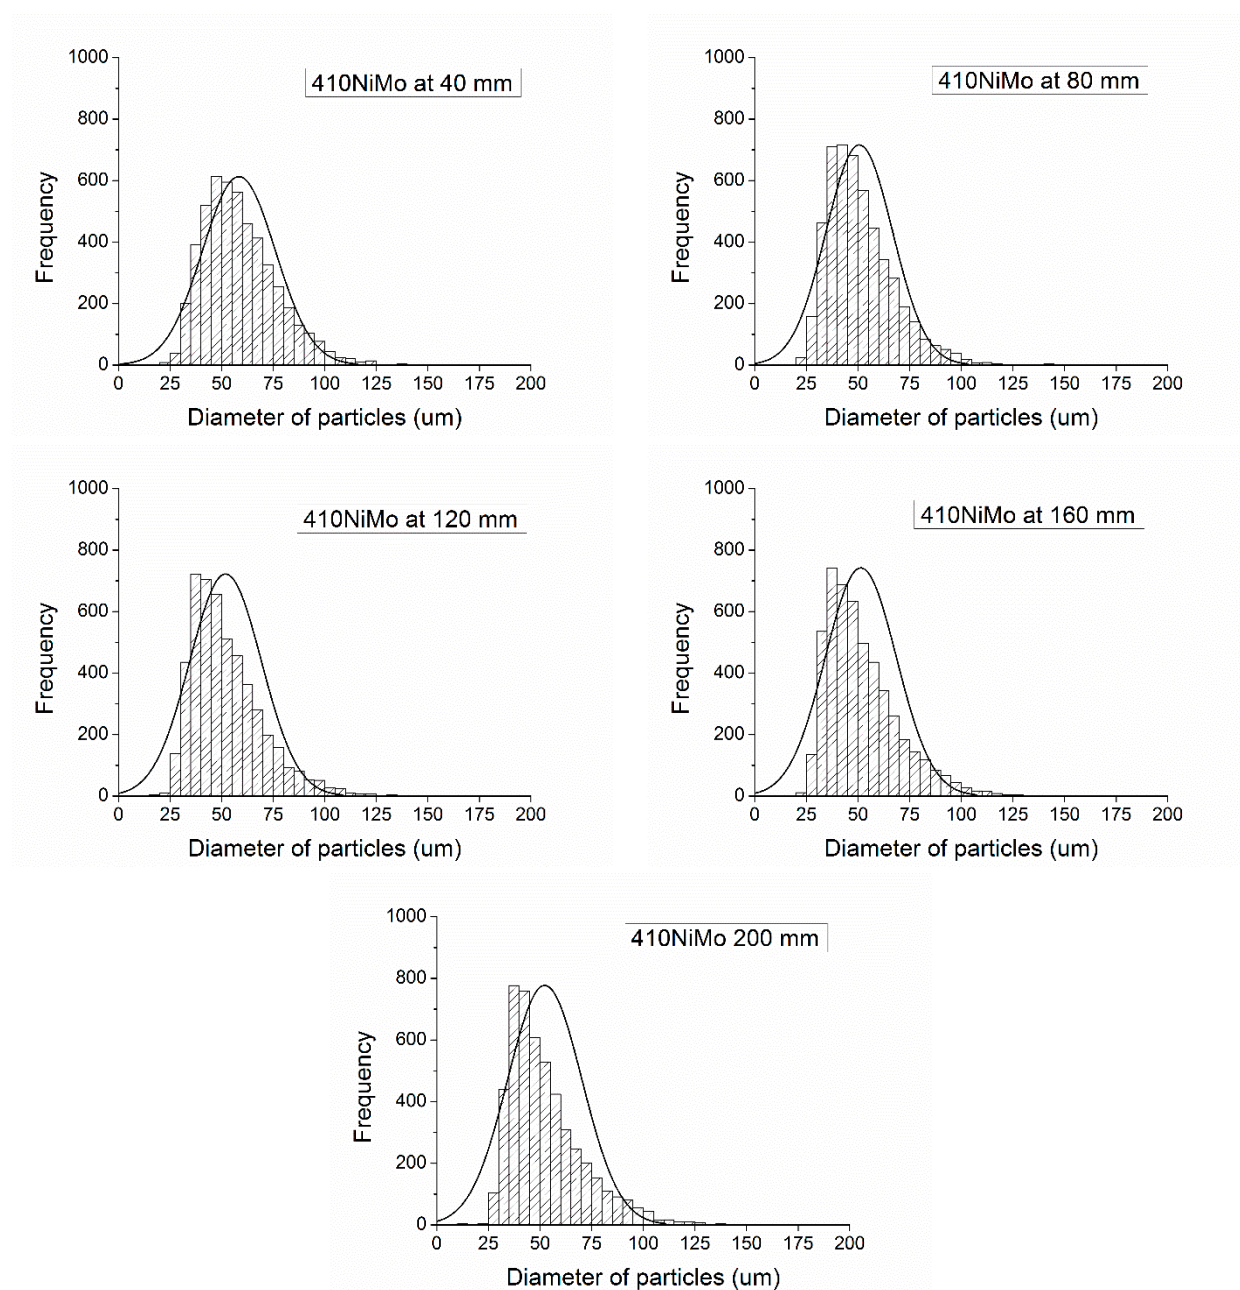

**Figure S3:** Histograms of diameter of 410NiMo particles observed in different distances from the gun.

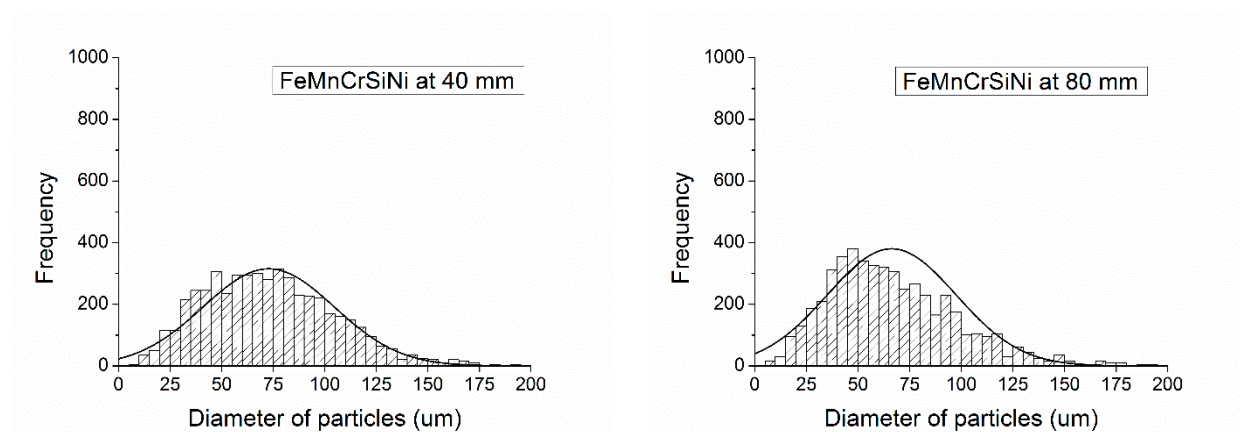

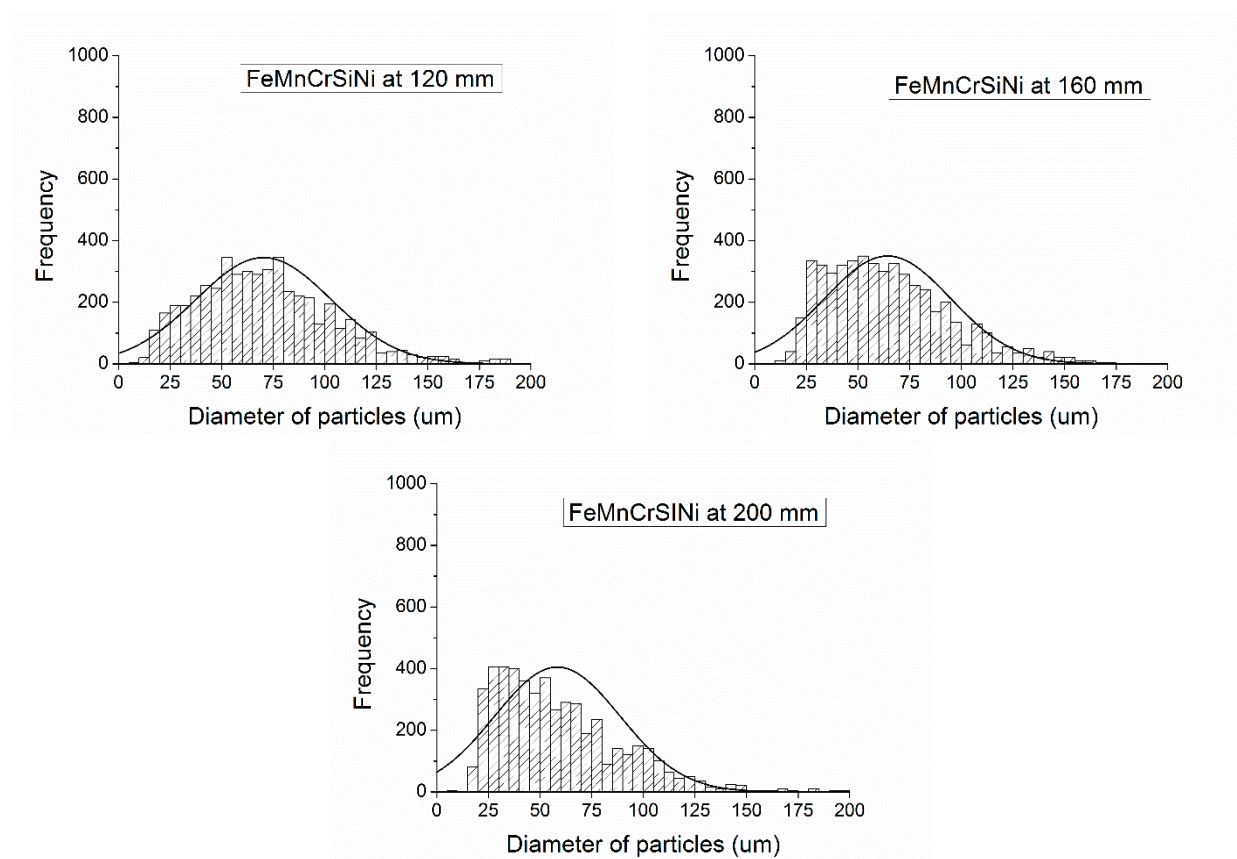

**Figure S4:** Histograms of diameter of FeMnCrSiNi particles observed in different distances from the gun.

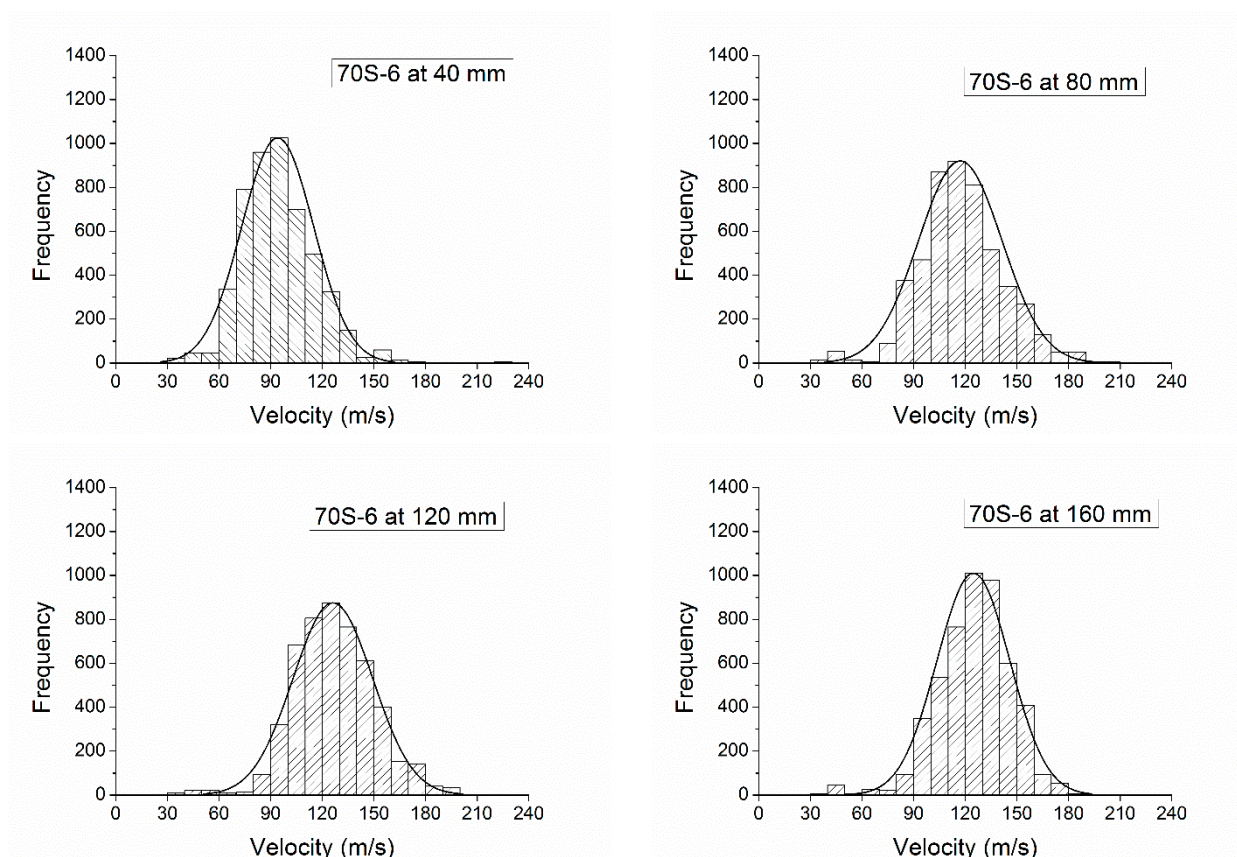



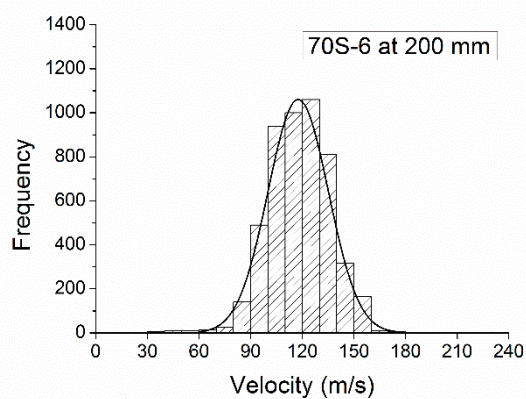

**Figure S5:** Histograms of velocity of 70S-6 particles observed in different distances from the gun.

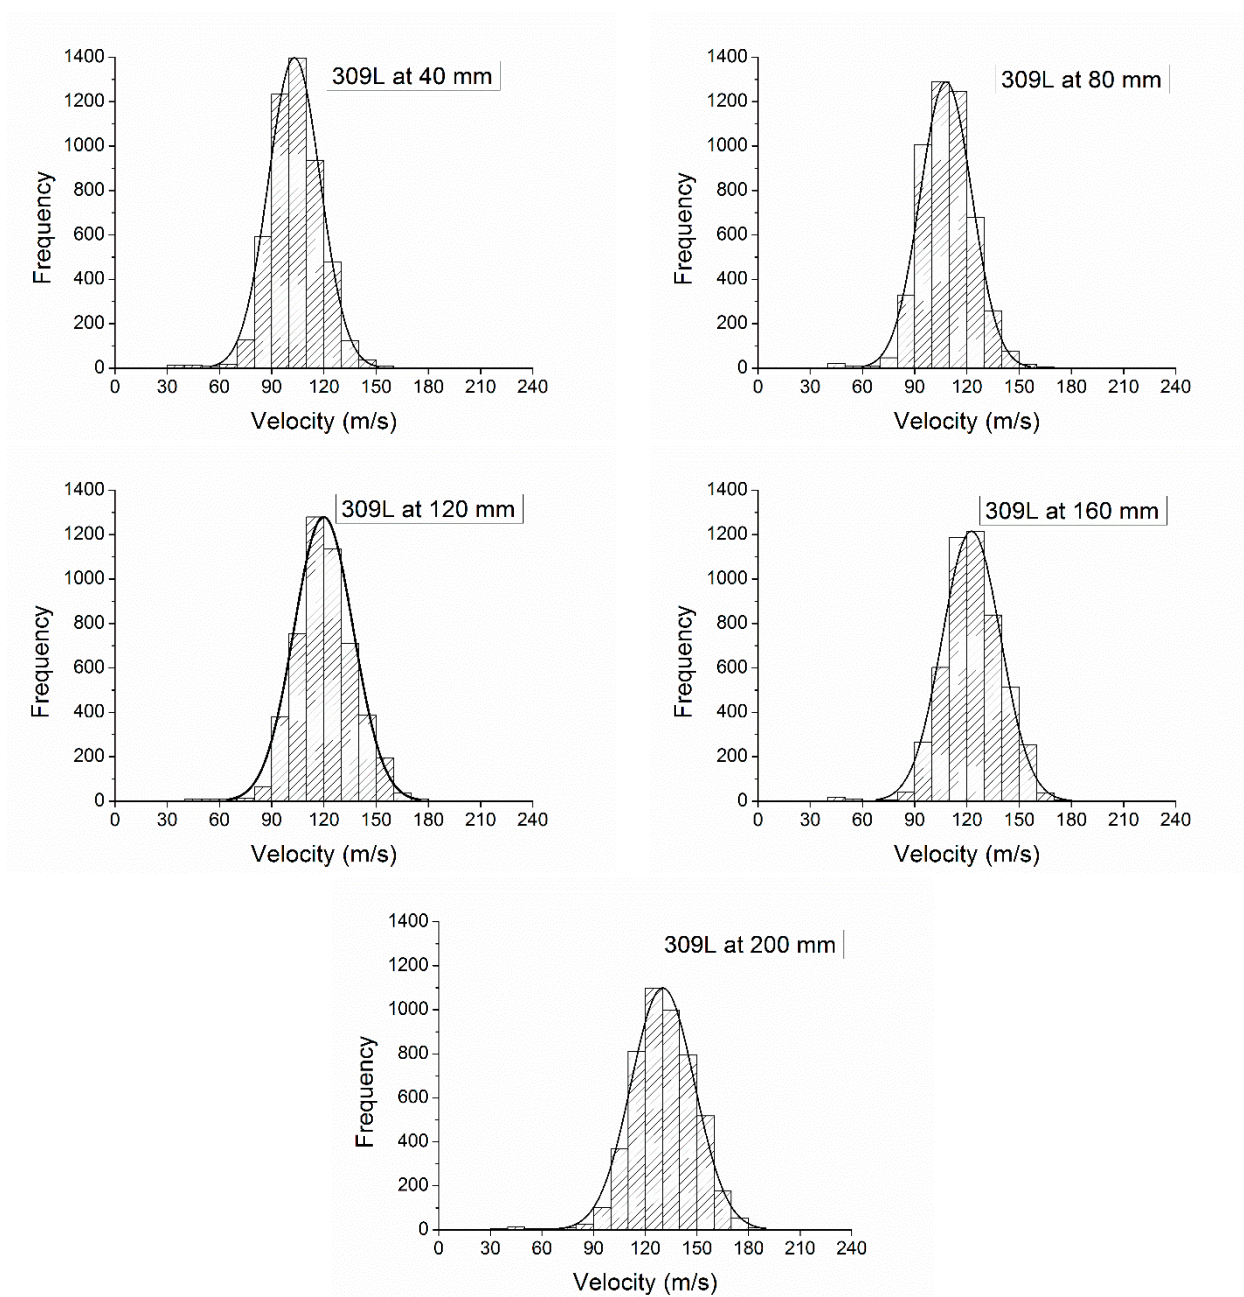

**Figure S6:** Histograms of velocity of 309L particles observed in different distances from the gun.

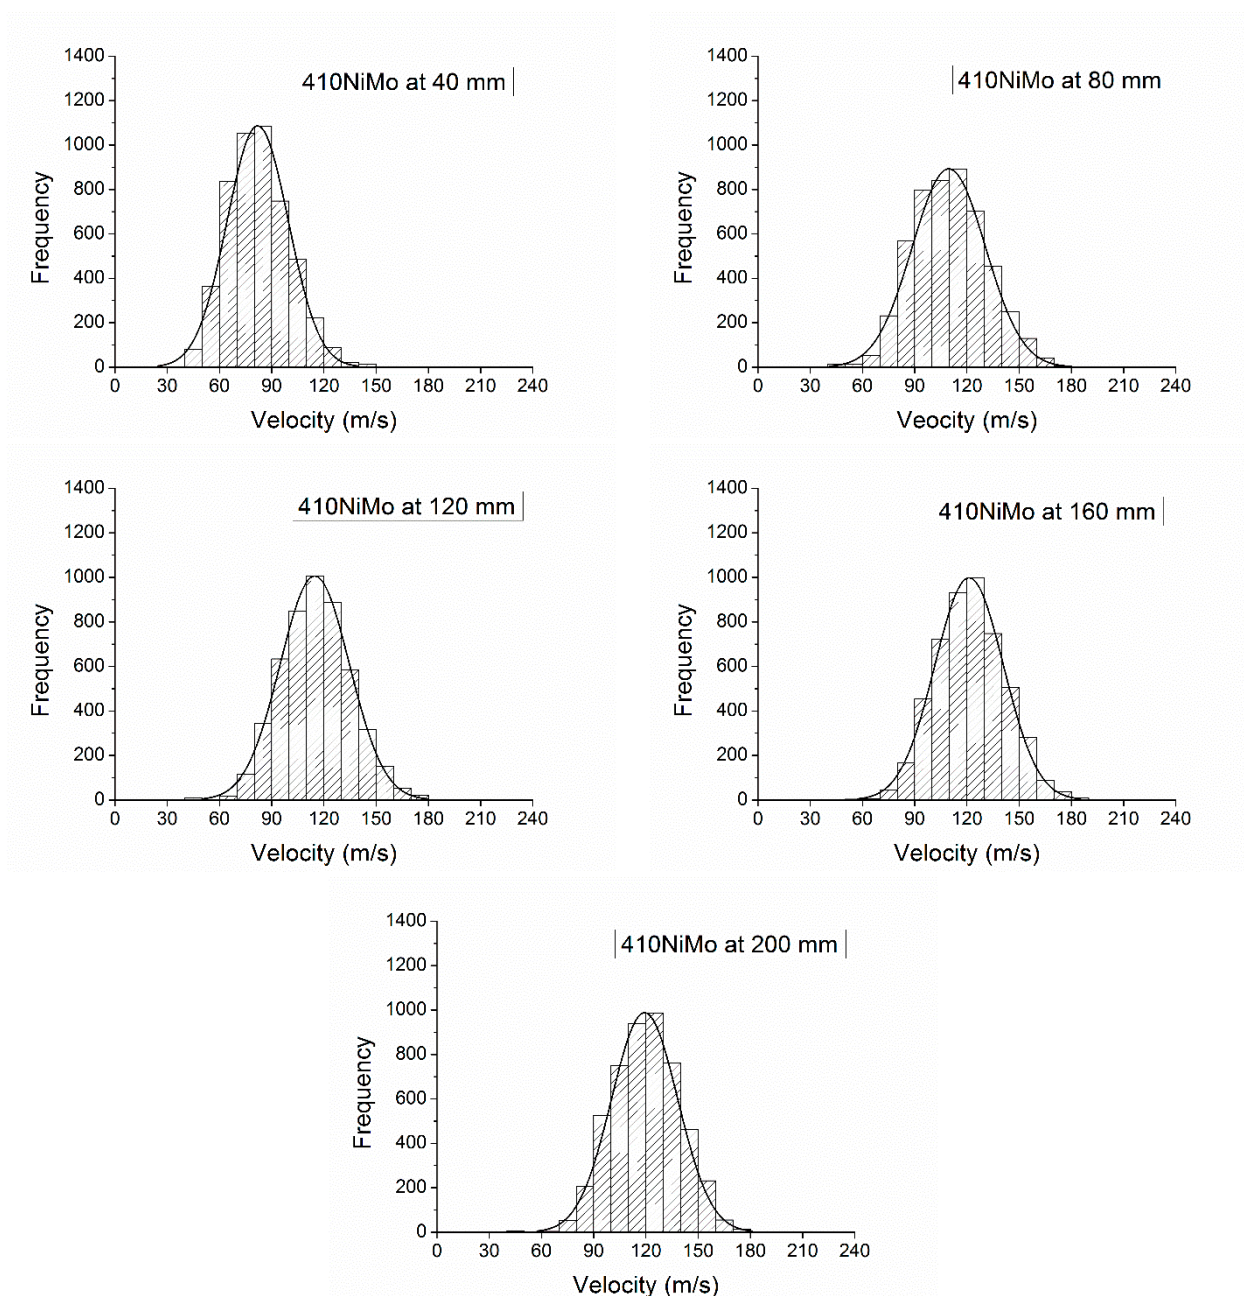

**Figure S7:** Histograms of velocity of 410NiMo particles observed in different distances from the gun.

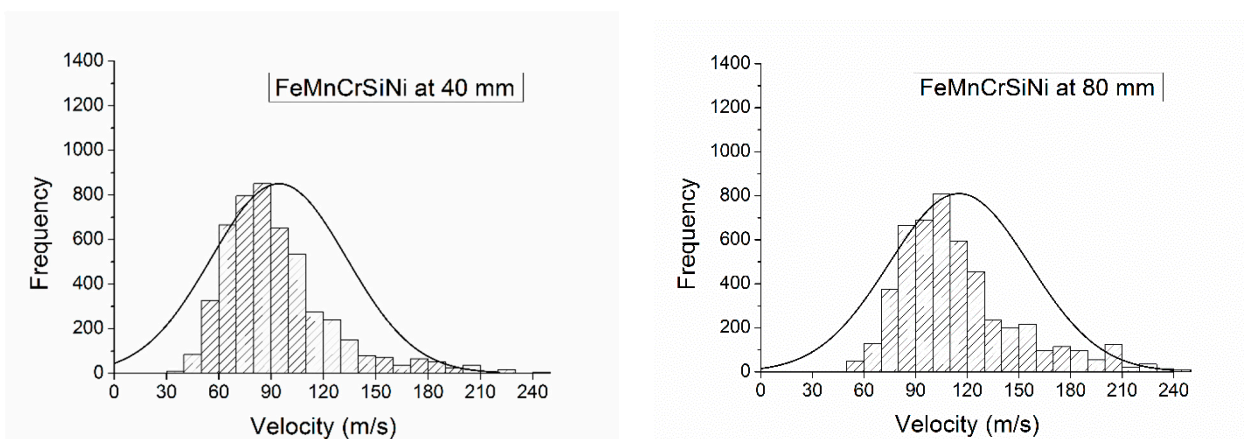



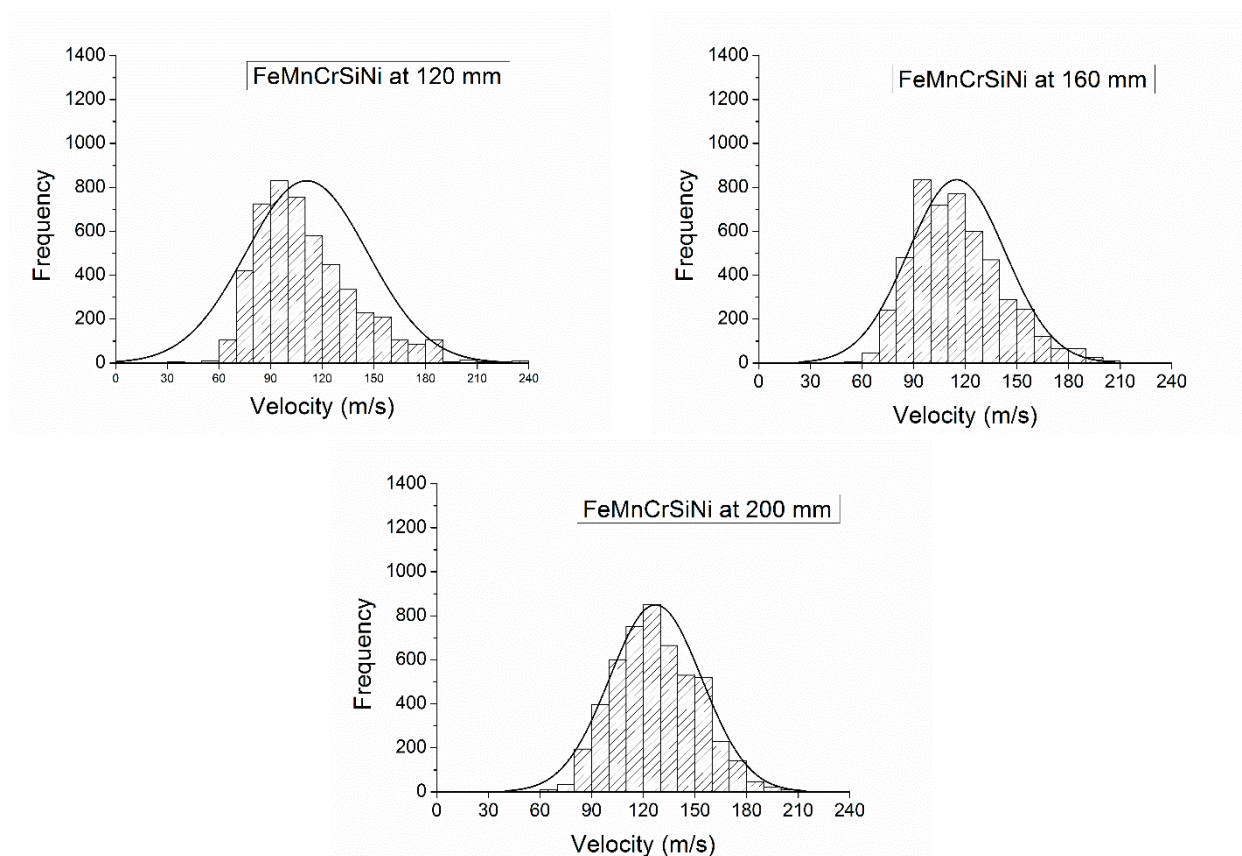

**Figure S8:** Histograms of velocity of FeMnCrSiNi particles observed in different distances from the gun.

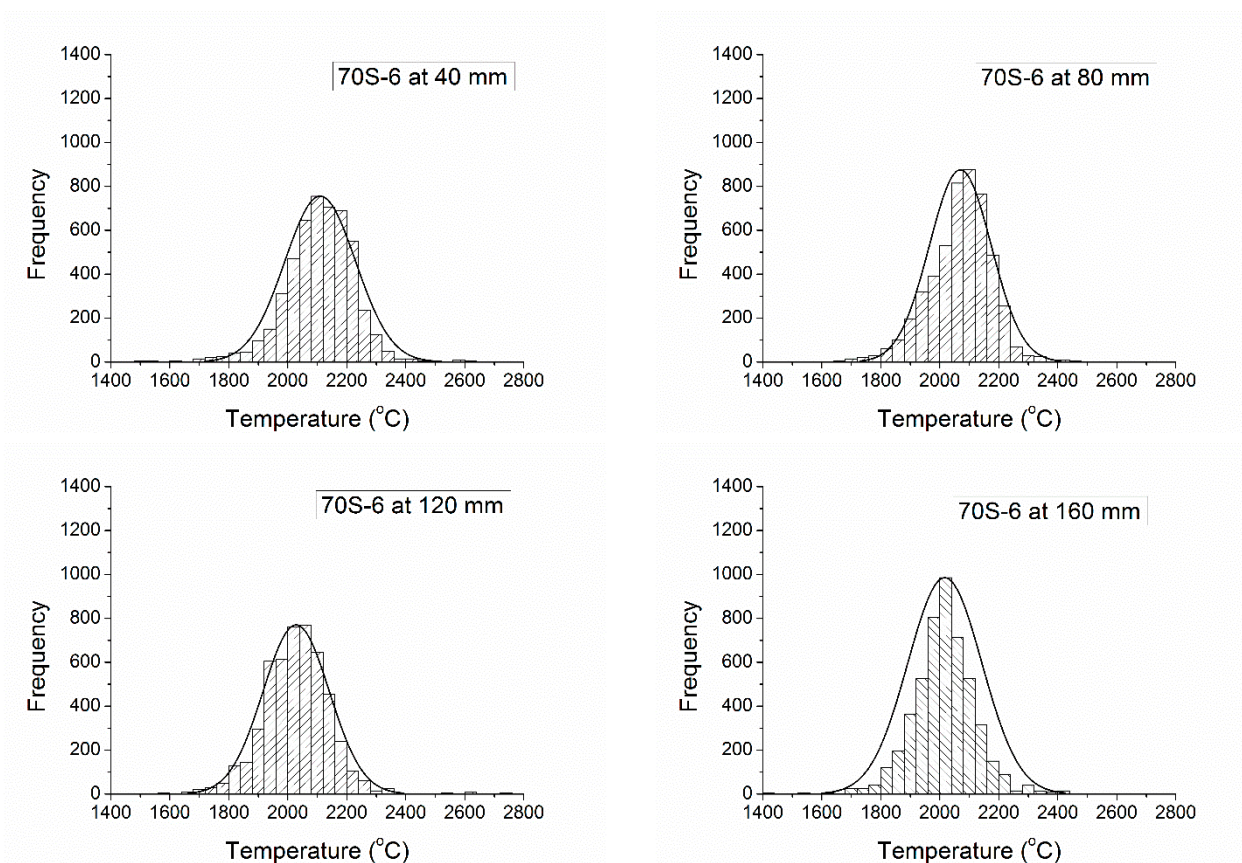

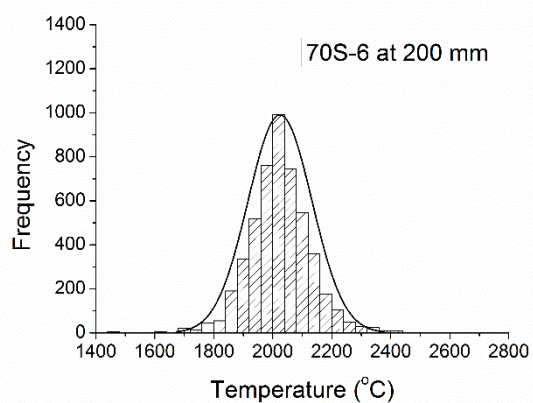

**Figure S9:** Histograms of temperature of 70S-6 particles observed in different distances from the gun.

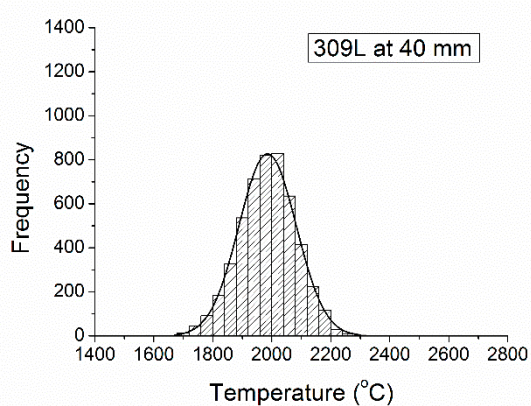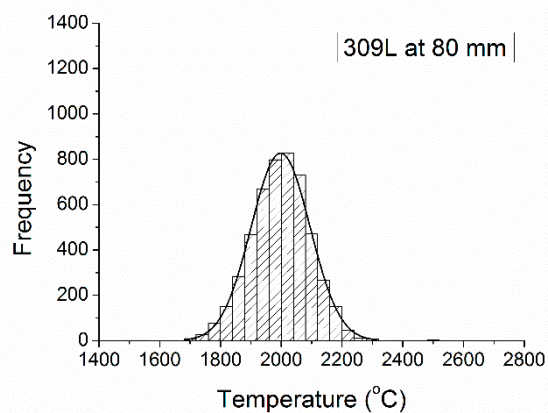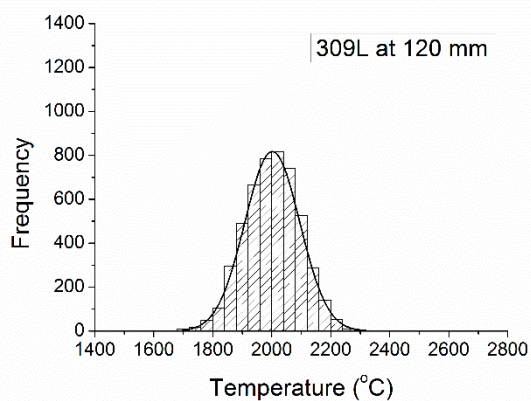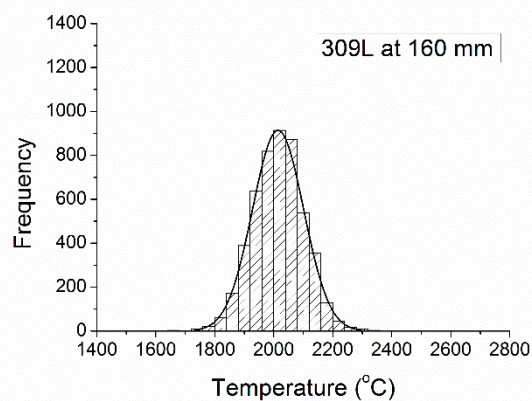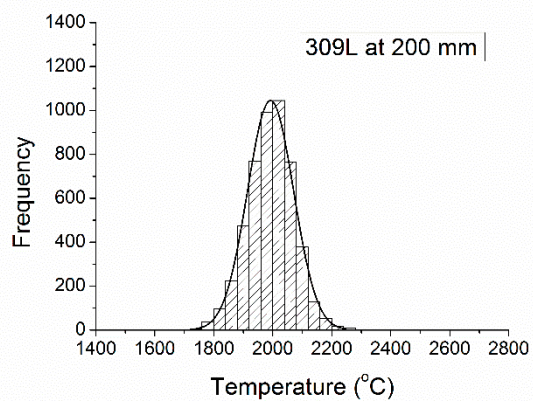

**Figure S10:** Histograms of temperature of 309L particles observed in different distances from the gun.



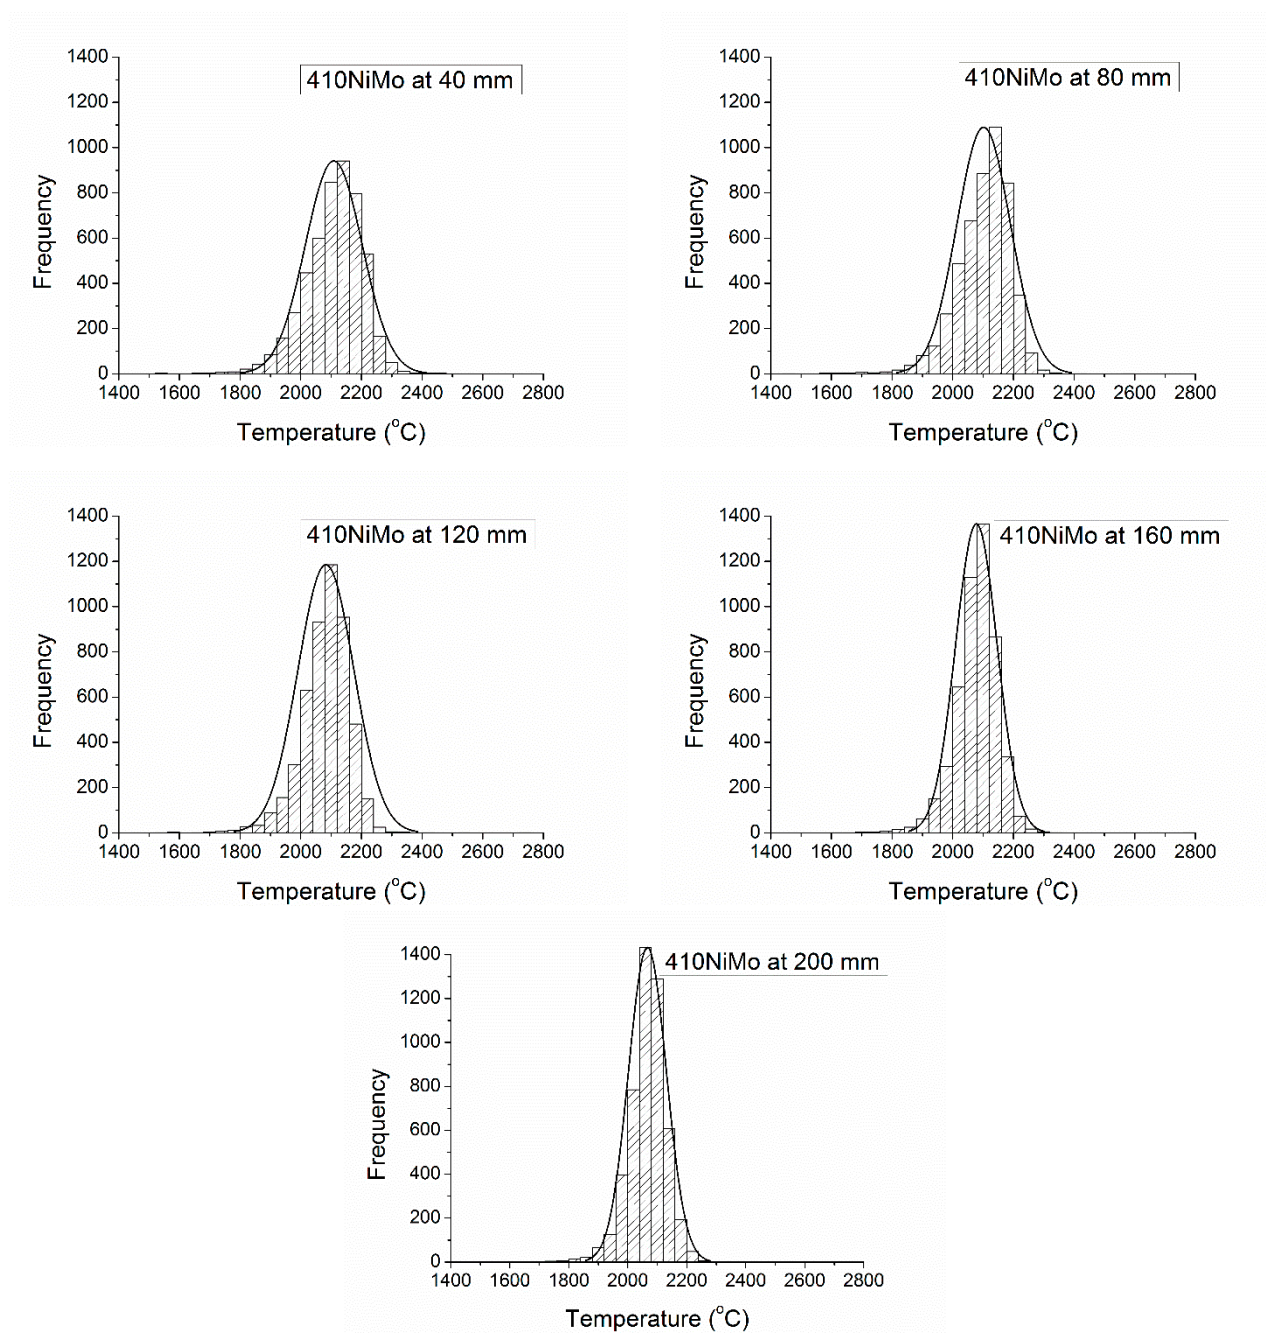

**Figure S11:** Histograms of temperature of 410NiMo particles observed in different distances from the gun.

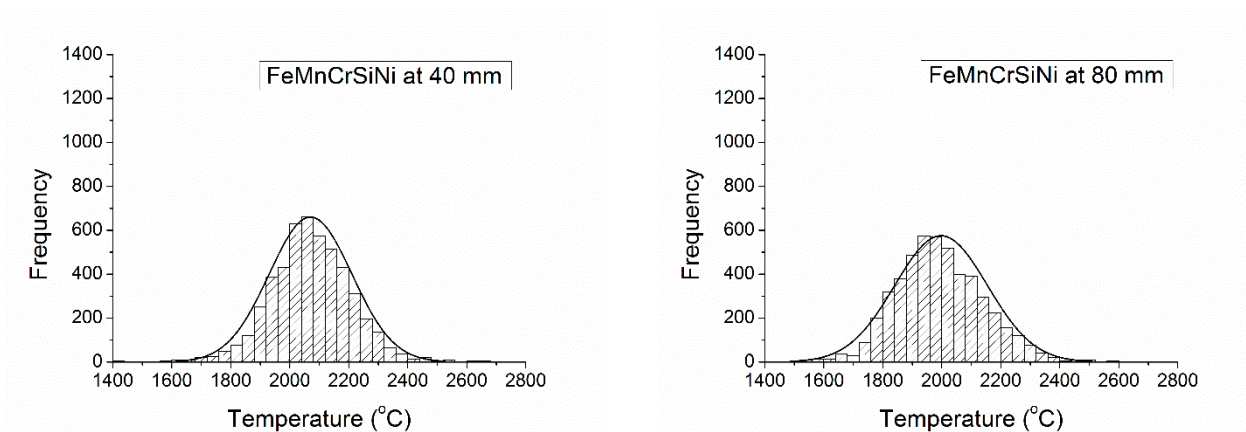

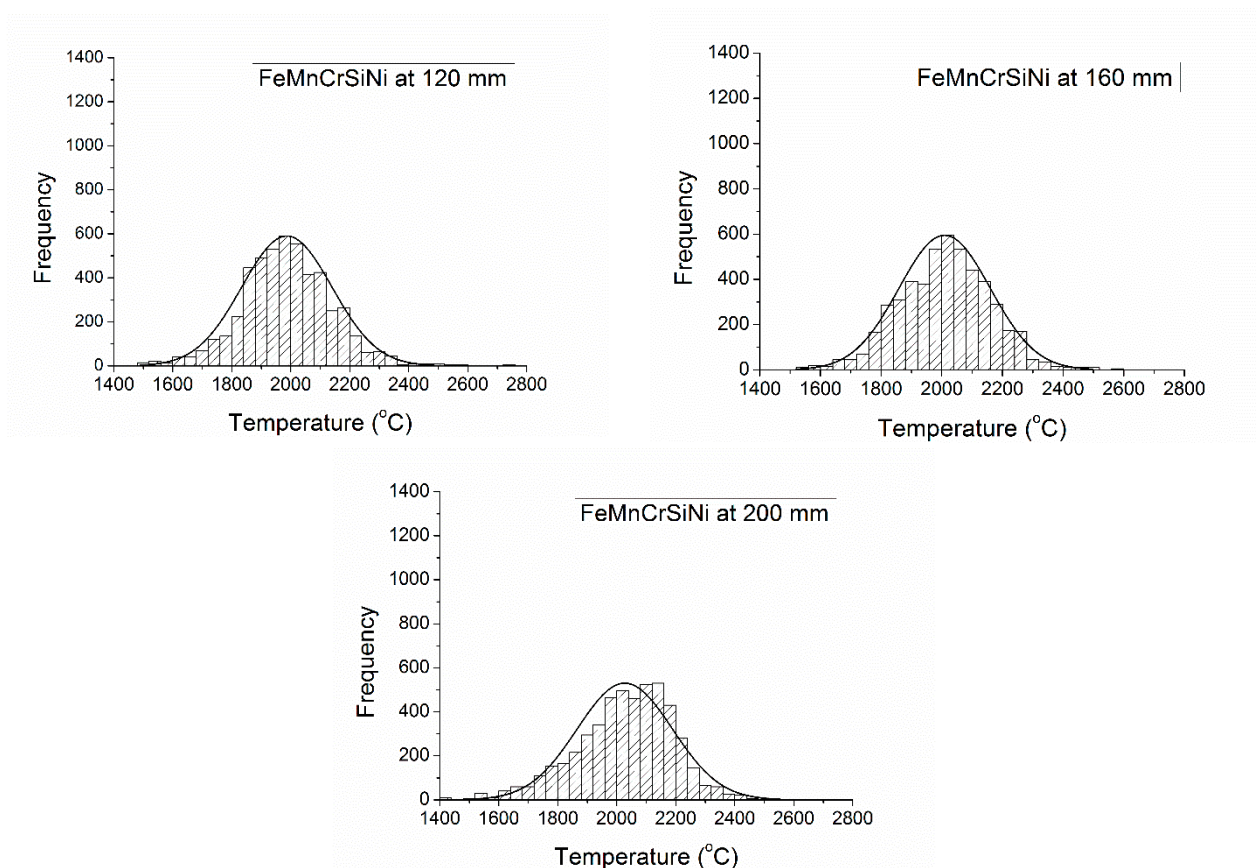

**Figure S12:** Histograms of temperature of FeMnCrSiNi particles observed in different distances from the gun.
